# Supplementary material for: Myco-Barriers as Sustainable Tool for Port Seawater Decontamination from Metals
Source: MDPI journal article supplement (doi:10.3390/jmse11061117), 2023-05-25
Supplement: s1 [file s1]

**Table S5:** PTEs concentration after 15 (1) and 30 (2) days in Cavo site A waters (EL-1-AQ; EL-2-AQ), vegetable barriers (EL-1-VE; EL-2-VE), *T. harzianum* autochthonous myco-barriers (EL-1-TH.aut.; EL-2-TH.aut.), native mixture myco-barriers (EL-1-MIX; EL-2-MIX), commercial barriers (EL-1-PA; EL-2-PA). nd= not detected. PTEs concentrations in water are expressed in  $\mu\text{g L}^{-1}$ , in barriers in  $\text{mg kg}^{-1}$ .

|        | EL-1-AQ | EL-1-VE |                    | EL-1-TH.aut. |                    | EL-1-MIX |                    | EL-1-PA |                    |
|--------|---------|---------|--------------------|--------------|--------------------|----------|--------------------|---------|--------------------|
| PTEs   | 1       | Mean    | Standard deviation | Mean         | Standard deviation | Mean     | Standard deviation | Mean    | Standard deviation |
| Al     | nd      | 31.5    | 11.1               | 22.5         | 10.2               | 8.9      | 0.3                | 8364.2  | 1376.5             |
| Sb     | nd      | nd      | nd                 | nd           | nd                 | nd       | nd                 | nd      | nd                 |
| As     | 2.0     | nd      | nd                 | nd           | nd                 | nd       | nd                 | 0.3     | 0.1                |
| Cd     | nd      | nd      | nd                 | nd           | nd                 | nd       | nd                 | nd      | nd                 |
| Cr tot | nd      | 0.1     | 0.0                | 0.1          | 0.0                | nd       | nd                 | 1.7     | 0.2                |
| Fe     | nd      | 36.6    | 5.0                | 31.2         | 4.9                | 39.2     | 15.0               | 5877.1  | 1013.0             |
| Mn     | 14.0    | 1.5     | 0.3                | 1.9          | 0.7                | 0.8      | 0.5                | 175.8   | 30.3               |
| Hg     | nd      | nd      | nd                 | nd           | nd                 | nd       | nd                 | nd      | nd                 |
| Ni     | nd      | 0.2     | 0.0                | nd           | nd                 | 0.1      | 0.0                | 0.6     | 0.1                |
| Pb     | nd      | nd      | nd                 | 0.2          | 0.1                | 0.1      | 0.0                | 0.7     | 0.1                |
| Cu     | nd      | 0.9     | 0.2                | 0.9          | 0.0                | 0.8      | 0.0                | 1.0     | 0.2                |
| Zn     | nd      | 2.2     | 0.5                | 2.9          | 0.2                | 2.0      | 0.3                | 14.0    | 2.1                |
|        | EL-2-AQ | EL-2-VE |                    | EL-2-TH.aut. |                    | EL-2-MIX |                    | EL-2-PA |                    |
| PTEs   | 1.0     | Mean    | Standard deviation | Mean         | Standard deviation | Mean     | Standard deviation | Mean    | Standard deviation |
| Al     | nd      | 27.0    | 2.1                | 14.1         | 3.8                | 11.6     | 2.0                | 10005.8 | 989.3              |
| Sb     | 2.6     | nd      | nd                 | nd           | nd                 | nd       | nd                 | nd      | nd                 |
| As     | 2.0     | nd      | nd                 | nd           | nd                 | nd       | nd                 | 0.5     | 0.2                |
| Cd     | nd      | nd      | nd                 | nd           | nd                 | nd       | nd                 | nd      | nd                 |
| Cr tot | nd      | 0.1     | 0.0                | nd           | nd                 | nd       | nd                 | 1.9     | 0.2                |
| Fe     | 18.0    | 50.4    | 7.8                | 26.6         | 2.0                | 78.0     | 11.0               | 6728.2  | 559.3              |
| Mn     | nd      | 2.5     | 0.7                | 2.4          | 0.5                | 1.7      | 0.2                | 201.2   | 20.6               |
| Hg     | 0.5     | nd      | nd                 | nd           | nd                 | nd       | nd                 | nd      | nd                 |
| Ni     | nd      | 0.5     | 0.1                | 0.2          | 0.1                | 0.6      | 0.1                | 0.9     | 0.2                |
| Pb     | nd      | 0.5     | 0.2                | 0.3          | 0.2                | 0.3      | 0.1                | 1.0     | 0.3                |

|    |      |     |     |     |     |     |     |      |     |
|----|------|-----|-----|-----|-----|-----|-----|------|-----|
| Cu | nd   | 2.2 | 0.5 | 1.8 | 0.1 | 2.1 | 0.3 | 2.5  | 0.6 |
| Zn | 44.0 | 5.6 | 0.8 | 4.4 | 0.9 | 4.4 | 0.4 | 20.8 | 2.6 |
