# Supplementary material for: Myco-Barriers as Sustainable Tool for Port Seawater Decontamination from Metals
Source: MDPI journal article supplement (doi:10.3390/jmse11061117), 2023-05-25
Supplement: s1 [file s1]

**Table S4:** PTEs concentration after 15 (1) and 30 (2) days in Cavo site A waters (EL-1-AQ; EL-2-AQ), vegetable barriers (EL-1-VE; EL-2-VE), *T. harzianum* allochthonous myco-barriers (EL-1-TH.all.; EL-2-TH.all.), *P. ostreatus* myco-barriers (EL-1-PO; EL-2-PO), commercial barriers (EL-1-PA; EL-2-PA). nd= not detected. PTEs concentrations in water are expressed in  $\mu\text{g L}^{-1}$ , in barriers in  $\text{mg kg}^{-1}$ .

|        | EL-1-AQ | EL-1-VE |                    | EL-1-TH.all. |                    | EL-1-PO |                    | EL-1-PA |                    |
|--------|---------|---------|--------------------|--------------|--------------------|---------|--------------------|---------|--------------------|
| PTEs   | 1       | Mean    | Standard deviation | Mean         | Standard deviation | Mean    | Standard deviation | Mean    | Standard deviation |
| Al     | 416.0   | 23.1    | 6.7                | 46.6         | 3.5                | 43.7    | 23.2               | 5824.2  | 752.0              |
| Sb     | nd      | nd      | nd                 | nd           | nd                 | nd      | nd                 | nd      | nd                 |
| As     | 13.0    | 0.2     | 0.1                | 0.2          | 0.1                | 0.3     | 0.1                | 0.3     | 0.1                |
| Cd     | nd      | nd      | nd                 | nd           | nd                 | nd      | nd                 | nd      | nd                 |
| Cr tot | nd      | 0.2     | 0.1                | 0.1          | 0.0                | 0.2     | 0.1                | 1.4     | 0.2                |
| Fe     | 45.0    | 40.4    | 12.6               | 60.1         | 12.7               | 63.8    | 36.1               | 4159.4  | 544.9              |
| Mn     | 76.0    | 1.7     | 0.5                | 2.8          | 0.6                | 3.3     | 0.5                | 141.5   | 17.2               |
| Hg     | nd      | nd      | nd                 | nd           | nd                 | nd      | nd                 | nd      | nd                 |
| Ni     | 3.0     | 0.3     | 0.1                | 0.2          | 0.0                | 0.2     | 0.1                | 0.6     | 0.1                |
| Pb     | nd      | 0.2     | 0.1                | 0.2          | 0.0                | 0.2     | 0.0                | 0.6     | 0.2                |
| Cu     | nd      | 1.3     | 0.5                | 2.5          | 0.3                | 2.8     | 0.4                | 1.5     | 0.5                |
| Zn     | 29.0    | 6.0     | 1.8                | 7.3          | 0.5                | 14.7    | 2.4                | 11.9    | 7.8                |
|        | EL-2-AQ | EL-2-VE |                    | EL-2-TH.all. |                    | EL-2-PO |                    | EL-2-PA |                    |
| PTEs   | 1.0     | Mean    | Standard deviation | Mean         | Standard deviation | Mean    | Standard deviation | Mean    | Standard deviation |
| Al     | 173.0   | 23.8    | 6.6                | 63.1         | 22.0               | 38.5    | 19.6               | 6829.6  | 937.1              |
| Sb     | nd      | nd      | nd                 | nd           | nd                 | nd      | nd                 | nd      | nd                 |
| As     | 11.0    | nd      | nd                 | 0.2          | 0.1                | 0.2     | 0.0                | 0.6     | 0.5                |
| Cd     | nd      | nd      | nd                 | nd           | nd                 | nd      | nd                 | nd      | nd                 |
| Cr tot | nd      | 0.5     | 0.4                | 0.2          | 0.1                | 0.2     | 0.1                | 1.6     | 0.2                |
| Fe     | 59.0    | 48.8    | 30.1               | 82.9         | 48.8               | 147.9   | 134.0              | 4746.0  | 418.4              |
| Mn     | 40.0    | 2.0     | 0.6                | 4.3          | 2.4                | 1.7     | 0.4                | 169.5   | 25.0               |
| Hg     | nd      | nd      | nd                 | nd           | nd                 | nd      | nd                 | nd      | nd                 |
| Ni     | nd      | 0.3     | 0.1                | 0.3          | 0.1                | 0.2     | 0.1                | 0.8     | 0.1                |
| Pb     | nd      | 0.1     | 0.0                | 0.2          | 0.1                | 0.3     | 0.1                | 0.8     | 0.1                |

|    |      |     |     |     |     |     |     |      |     |
|----|------|-----|-----|-----|-----|-----|-----|------|-----|
| Cu | nd   | 0.9 | 0.5 | 4.0 | 1.9 | 1.5 | 0.7 | 2.3  | 0.6 |
| Zn | 29.0 | 3.4 | 2.5 | 6.7 | 1.1 | 9.0 | 3.4 | 19.4 | 3.1 |
