# Supplementary material for: Myco-Barriers as Sustainable Tool for Port Seawater Decontamination from Metals
Source: MDPI journal article supplement (doi:10.3390/jmse11061117), 2023-05-25
Supplement: s1 [file s1]

**Table S1:** Results of the ICP-MS analyses of the PTEs at initial time (0) in Genoa waters (GE-0-AQ), in commercial barriers (GE-0-PA), in barriers made only by vegetable substrate (GE-0-VE), in myco-barriers inoculated with *T. versicolor* (GE-0-TV), in myco-barriers inoculated with *T. harzianum* autochthonous strain (GE-0-TH), in myco-barriers inoculated with the strain of *P. ostreatus* (GE-0-PO). nd= not detected. PTEs concentrations in water are expressed in  $\mu\text{g L}^{-1}$ , in barriers in  $\text{mg kg}^{-1}$ .

|        | GE-0-AQ |                    | GE-0-PA |                    | GE-0-VE |                    | GE-0-TV |                    | GE-0-TH |                    | GE-0-PO |                    |
|--------|---------|--------------------|---------|--------------------|---------|--------------------|---------|--------------------|---------|--------------------|---------|--------------------|
| PTEs   | Mean    | Standard deviation |
| Al     | nd      | nd                 | 5.9     | 0.3                | 11.9    | 0.8                | 42.1    | 0.0                | 11.0    | 1.7                | 23.2    | 16.2               |
| Sb     | 5.2     | 1.6                | nd      | nd                 |
| As     | 3.0     | 0.0                | 0.5     | 0.2                | 0.2     | 0.1                | nd      | nd                 | 0.2     | 0.1                | 0.2     | 0.1                |
| Cd     | nd      | nd                 |
| Cr tot | nd      | nd                 | 0.2     | 0.1                |
| Fe     | 20.0    | 10.6               | 4.4     | 0.9                | 26.2    | 3.8                | 9.6     | 0.0                | 18.9    | 2.4                | 42.6    | 24.0               |
| Mn     | nd      | nd                 | 1.5     | 0.1                | 13.1    | 0.7                | 4.5     | 0.0                | 12.1    | 0.7                | 39.4    | 24.9               |
| Hg     | nd      | nd                 |
| Ni     | nd      | nd                 | nd      | nd                 | 0.2     | 0.0                | 0.3     | 0.0                | 0.1     | 0.0                | 0.4     | 0.2                |
| Pb     | nd      | nd                 | 6.6     | 5.1                | 0.2     | 0.1                | 0.1     | 0.0                | 0.2     | 0.1                | 0.3     | 0.1                |
| Cu     | nd      | nd                 | 2.7     | 2.0                | 0.5     | 0.0                | 1.4     | 0.0                | 0.6     | 0.1                | 2.5     | 0.2                |
| Zn     | 16.5    | 9.0                | 1.3     | 0.4                | 2.5     | 0.0                | 10.6    | 0.0                | 2.7     | 0.8                | 9.5     | 0.8                |
