# Supplementary material for: Myco-Barriers as Sustainable Tool for Port Seawater Decontamination from Metals
Source: MDPI journal article supplement (doi:10.3390/jmse11061117), 2023-05-25
Supplement: s1 [file s1]

**Table S3:** Results of the ICP-MS analyses of the PTEs concentration at the initial time (0) in Cavo waters site A (EL-A-0-AQ), in Cavo waters site B (EL-B-0-AQ), in barriers made only by vegetable substrate (EL-0-VE), in myco-barriers inoculated with *P. ostreatus* (EL-0-PO), in myco-barriers inoculated with the allochthonous strain of *T. harzianum* ( EL-0-TH.all.), in myco-barriers inoculated with *T. harzianum* autochthonous strain (EL-0-TH.aut), in myco-barriers inoculated with the mixture of native fungal strains (EL-0-MIX), in commercial barriers (EL-0-PA). nd= not detected. PTEs concentrations in water are expressed in  $\mu\text{g L}^{-1}$ , in barriers in  $\text{mg kg}^{-1}$ .

|        | EL-A-0-AQ | EL-B-0-AQ | EL-0-VE |                    | EL-0-PO |                    | EL-0-TH.all. |                    | EL-0-TH.aut |                    | EL-0-MIX |                    | EL-0-PA |
|--------|-----------|-----------|---------|--------------------|---------|--------------------|--------------|--------------------|-------------|--------------------|----------|--------------------|---------|
| PTEs   |           |           | Mean    | Standard deviation | Mean    | Standard deviation | Mean         | Standard deviation | Mean        | Standard deviation | Mean     | Standard deviation | Value   |
| Al     | nd        | nd        | 24.2    | 10.7               | 41.7    | 15.0               | 41.5         | 1.4                | 12.0        | 1.7                | 10.9     | 0.3                | 46991.3 |
| Sb     | nd        | nd        | nd      | nd                 | nd      | nd                 | nd           | nd                 | nd          | nd                 | nd       | nd                 | nd      |
| As     | 2.0       | 2.0       | nd      | nd                 | nd      | nd                 | nd           | nd                 | nd          | nd                 | nd       | nd                 | nd      |
| Cd     | nd        | nd        | nd      | nd                 | nd      | nd                 | nd           | nd                 | nd          | nd                 | nd       | nd                 | nd      |
| Cr tot | nd        | nd        | 0.1     | 0.0                | 0.2     | 0.0                | 0.1          | 0.0                | 0.1         | 0.0                | nd       | nd                 | 7.4     |
| Fe     | nd        | nd        | 46.9    | 18.0               | 54.6    | 13.0               | 10.7         | 1.5                | 23.6        | 0.4                | 22.2     | 2.4                | 47003.9 |
| Mn     | 8.0       | nd        | 17.6    | 2.3                | 40.6    | 30.9               | 4.9          | 0.4                | 11.7        | 0.2                | 15.5     | 0.5                | 1106.5  |
| Hg     | nd        | nd        | nd      | nd                 | nd      | nd                 | nd           | nd                 | nd          | nd                 | nd       | nd                 | nd      |
| Ni     | nd        | nd        | 0.3     | 0.0                | 0.4     | 0.1                | 0.3          | 0.0                | 0.2         | 0.0                | 0.2      | 0.0                | 2.0     |
| Pb     | nd        | nd        | 0.2     | 0.1                | 0.3     | 0.1                | 0.2          | 0.0                | nd          | nd                 | 0.1      | 0.0                | 3.3     |
| Cu     | nd        | nd        | 1.0     | 0.0                | 2.2     | 0.8                | 1.1          | 0.0                | 0.6         | 0.2                | 0.7      | 0.2                | 4.9     |
| Zn     | nd        | nd        | 3.3     | 0.1                | 11.3    | 0.9                | 9.4          | 0.8                | 2.1         | 0.6                | 2.2      | 0.4                | 82.5    |
