# Supplementary material for: Myco-Barriers as Sustainable Tool for Port Seawater Decontamination from Metals
Source: MDPI journal article supplement (doi:10.3390/jmse11061117), 2023-05-25
Supplement: s1 [file s1]

**Table S7:** PTEs concentration after 15 (1) and 30 (2) days in Cavo site B waters (EL-1-AQ; EL-2-AQ), vegetable barriers (EL-1-VE; EL-2-VE), *T. harzianum* autochthonous myco-barriers (EL-1-TH.aut.; EL-2-TH.aut.), native mixture myco-barriers (EL-1-MIX; EL-2-MIX), commercial barriers (EL-1-PA; EL-2-PA). nd= not detected. PTEs concentrations in water are expressed in  $\mu\text{g L}^{-1}$ , in barriers in  $\text{mg kg}^{-1}$ .

|        | EL-1-AQ   | EL-1-VE |                    | EL-1-TH.aut. |                    | EL-1-MIX |                    | EL-1-PA |                    |
|--------|-----------|---------|--------------------|--------------|--------------------|----------|--------------------|---------|--------------------|
| PTEs   | 1         | Mean    | Standard deviation | Mean         | Standard deviation | Mean     | Standard deviation | Mean    | Standard deviation |
| Al     | nd        | 62.8    | 11.1               | 15.7         | 6.3                | 9.1      | 2.1                | 8811.7  | 802.8              |
| Sb     | nd        | nd      | nd                 | nd           | nd                 | nd       | nd                 | nd      | nd                 |
| As     | 2 $\pm$ 1 | nd      | nd                 | nd           | nd                 | nd       | nd                 | 0.3     | 0.1                |
| Cd     | nd        | nd      | nd                 | nd           | nd                 | nd       | nd                 | nd      | nd                 |
| Cr tot | nd        | 0.2     | 0.0                | 0.1          | 0.0                | nd       | nd                 | 1.7     | 0.2                |
| Fe     | nd        | 71.1    | 20.1               | 37.8         | 12.8               | 42.5     | 14.8               | 5975.2  | 340.9              |
| Mn     | nd        | 2.7     | 0.5                | 2.0          | 0.6                | 1.5      | 0.5                | 186.8   | 18.4               |
| Hg     | nd        | nd      | nd                 | nd           | nd                 | nd       | nd                 | nd      | nd                 |
| Ni     | nd        | 0.3     | 0.1                | 0.2          | 0.1                | 0.1      | 0.0                | 0.9     | 0.2                |
| Pb     | nd        | 0.2     | 0.0                | nd           | nd                 | 0.1      | 0.0                | 0.8     | 0.1                |
| Cu     | nd        | 3.5     | 1.0                | 1.1          | 0.3                | 0.9      | 0.2                | 1.4     | 0.4                |
| Zn     | nd        | 6.4     | 0.8                | 2.4          | 0.6                | 1.9      | 0.6                | 15.6    | 2.2                |
|        | EL-2-AQ   | EL-2-VE |                    | EL-2-TH.aut. |                    | EL-2-MIX |                    | EL-2-PA |                    |
| PTEs   | 1         | Mean    | Standard deviation | Mean         | Standard deviation | Mean     | Standard deviation | Mean    | Standard deviation |
| Al     | nd        | 14.7    | 3.5                | 10.6         | 1.5                | 12.0     | 4.1                | 10207.2 | 1069.0             |
| Sb     | 1.6       | nd      | nd                 | nd           | nd                 | nd       | nd                 | nd      | nd                 |
| As     | 2         | 0.4     | 0.3                | nd           | nd                 | nd       | nd                 | 0.7     | 0.5                |
| Cd     | nd        | nd      | nd                 | nd           | nd                 | nd       | nd                 | nd      | nd                 |
| Cr tot | nd        | nd      | nd                 | nd           | nd                 | nd       | nd                 | 1.9     | 0.2                |
| Fe     | 15        | 26.5    | 6.3                | 24.6         | 2.4                | 27.6     | 7.6                | 6935.6  | 667.6              |
| Mn     | nd        | 1.9     | 0.4                | 1.6          | 0.2                | 2.2      | 0.4                | 205.2   | 20.6               |
| Hg     | 0.4       | nd      | nd                 | nd           | nd                 | nd       | nd                 | nd      | nd                 |
| Ni     | nd        | 0.2     | 0.1                | 0.1          | 0.0                | 0.2      | 0.0                | 0.7     | 0.1                |

|    |    |     |     |     |     |     |     |      |     |
|----|----|-----|-----|-----|-----|-----|-----|------|-----|
| Pb | nd | 0.2 | 0.0 | 0.3 | 0.2 | 0.4 | 0.2 | 1.2  | 0.1 |
| Cu | nd | 1.8 | 0.2 | 1.5 | 0.2 | 2.3 | 0.4 | 2.3  | 0.2 |
| Zn | nd | 4.5 | 0.5 | 4.1 | 0.5 | 5.2 | 0.8 | 20.5 | 2.0 |
