# Supplementary material for: Myco-Barriers as Sustainable Tool for Port Seawater Decontamination from Metals
Source: MDPI journal article supplement (doi:10.3390/jmse11061117), 2023-05-25
Supplement: s1 [file s1]

**Table S2:** PTEs concentration after 15 (1) and 30 (2) days in Genoa waters (GE-1-AQ; GE-2-AQ), vegetable barriers (GE-1-VE; GE-2-VE), *T. versicolor* myco-barriers (GE-1-TV; GE-2-TV), *T. harzianum* autochthonous myco-barriers (GE-1-TH; GE-2-TH), *P. ostreatus* myco-barriers (GE-1-PO; GE-2-PO), commercial barriers (GE-1-PA; GE-2-PA). nd= not detected. PTEs concentrations in water are expressed in  $\mu\text{g L}^{-1}$ , in barriers in  $\text{mg kg}^{-1}$ .

|        | GE-1-AQ | GE-1-VE |                    | GE-1-TV |                    | GE-1-TH |                    | GE-1-PO |                    | GE-1-PA |                    |
|--------|---------|---------|--------------------|---------|--------------------|---------|--------------------|---------|--------------------|---------|--------------------|
| PTEs   | 1       | Mean    | Standard deviation |
| Al     | nd      | 18.4    | 3.2                | 43.7    | 11.5               | 12.0    | 3.0                | 24.5    | 3.0                | 45.7    | 12.1               |
| Sb     | nd      | nd      | nd                 | nd      | nd                 | nd      | nd                 | nd      | nd                 | nd      | nd                 |
| As     | 2.0     | 0.2     | 0.1                | nd      | nd                 | 0.2     | 0.1                | 0.3     | 0.1                | 0.4     | 0.1                |
| Cd     | nd      | nd      | nd                 | nd      | nd                 | nd      | nd                 | nd      | nd                 | nd      | nd                 |
| Cr tot | 7.0     | 0.2     | 0.0                | 0.2     | 0.0                | nd      | nd                 | 0.2     | 0.1                | 0.4     | 0.1                |
| Fe     | nd      | 42.1    | 12.7               | 50.3    | 12.0               | 19.2    | 3.7                | 40.3    | 9.2                | 191.9   | 18.3               |
| Mn     | nd      | 1.7     | 0.2                | 2.1     | 0.3                | 1.1     | 0.1                | 1.9     | 0.4                | 5.0     | 0.7                |
| Hg     | nd      | nd      | nd                 | nd      | nd                 | nd      | nd                 | nd      | nd                 | nd      | nd                 |
| Ni     | nd      | 0.3     | 0.0                | 0.4     | 0.1                | 0.2     | 0.1                | 1.3     | 1.4                | 0.4     | 0.1                |
| Pb     | nd      | 1.4     | 0.4                | 1.3     | 0.6                | 0.3     | 0.0                | 0.5     | 0.1                | 2.3     | 0.3                |
| Cu     | nd      | 8.9     | 2.9                | 7.7     | 3.2                | 1.3     | 0.2                | 2.4     | 0.3                | 5.7     | 1.1                |
| Zn     | 48.0    | 16.1    | 0.7                | 17.0    | 3.7                | 5.5     | 0.5                | 8.6     | 0.4                | 12.1    | 1.2                |
|        | GE-2-AQ | GE-2-VE |                    | GE-2-TV |                    | GE-2-TH |                    | GE-2-PO |                    | GE-2-PA |                    |
| PTEs   | 1.0     | Mean    | Standard deviation |
| Al     | nd      | 10.0    | 3.6                | 60.0    | 0.0                | 12.9    | 7.1                | 27.1    | 3.4                | 35.0    | 41.5               |
| Sb     | 1.4     | nd      | nd                 |
| As     | 4.0     | 0.2     | 0.1                | nd      | nd                 | nd      | nd                 | 0.2     | 0.0                | 0.3     | 0.1                |
| Cd     | nd      | nd      | nd                 | nd      | nd                 | nd      | nd                 | nd      | nd                 | nd      | nd                 |
| Cr tot | nd      | 0.1     | 0.0                | 0.6     | 0.0                | 0.1     | 0.0                | 0.1     | 0.0                | 0.9     | 0.4                |
| Fe     | 11.0    | nd      | nd                 | 112.5   | 0.0                | 105.3   | 62.2               | 45.0    | 7.3                | 198.7   | 250.8              |
| Mn     | nd      | 1.1     | 0.2                | 3.3     | 0.0                | 1.4     | 0.7                | 1.4     | 0.2                | 5.3     | 4.5                |
| Hg     | nd      | nd      | nd                 | nd      | nd                 | nd      | nd                 | nd      | nd                 | nd      | nd                 |
| Ni     | 15.0    | 0.1     | 0.0                | 0.6     | 0.0                | 0.7     | 0.3                | 0.2     | 0.0                | 1.1     | 0.5                |

|    |      |     |     |      |     |     |     |     |     |      |      |
|----|------|-----|-----|------|-----|-----|-----|-----|-----|------|------|
| Pb | nd   | 0.4 | 0.2 | 1.6  | 0.0 | 0.8 | 0.4 | 0.4 | 0.1 | 2.2  | 2.6  |
| Cu | nd   | 2.2 | 1.3 | 4.9  | 0.0 | 5.6 | 2.7 | 1.9 | 0.4 | 4.9  | 5.0  |
| Zn | 19.0 | 5.2 | 3.2 | 16.1 | 0.0 | 9.0 | 4.2 | 8.1 | 1.7 | 16.0 | 20.6 |
