# Supplementary material for: Myco-Barriers as Sustainable Tool for Port Seawater Decontamination from Metals
Source: MDPI journal article supplement (doi:10.3390/jmse11061117), 2023-05-25
Supplement: s1 [file s1]

**Table S6:** PTEs concentration after 15 (1) and 30 (2) days in Cavo site B waters (EL-1-AQ; EL-2-AQ), vegetable barriers (EL-1-VE; EL-2-VE), *T. harzianum* allochthonous myco-barriers (EL-1-TH.all.; EL-2-TH.all.), *P. ostreatus* myco-barriers (EL-1-PO; EL-2-PO), commercial barriers (EL-1-PA; EL-2-PA). nd= not detected. PTEs concentrations in water are expressed in  $\mu\text{g L}^{-1}$ , in barriers in  $\text{mg kg}^{-1}$ .

|        | EL-1-AQ | EL-1-VE |                    | EL-1-TH.all. |                    | EL-1-PO |                    | EL-1-PA |                    |
|--------|---------|---------|--------------------|--------------|--------------------|---------|--------------------|---------|--------------------|
| PTEs   | 1       | Mean    | Standard deviation | Mean         | Standard deviation | Mean    | Standard deviation | Mean    | Standard deviation |
| Al     | 225     | 31.4    | 6.2                | 75.3         | 29.7               | 47.6    | 9.8                | 6351.6  | 129.9              |
| Sb     | nd      | nd      | nd                 | nd           | nd                 | nd      | nd                 | nd      | nd                 |
| As     | 18      | 0.3     | 0.1                | 0.3          | 0.2                | 0.3     | 0.1                | 0.6     | 0.6                |
| Cd     | nd      | nd      | nd                 | nd           | nd                 | nd      | nd                 | nd      | nd                 |
| Cr tot | nd      | 0.2     | 0.0                | 0.2          | 0.1                | 0.2     | 0.0                | 1.6     | 0.1                |
| Fe     | 53      | 136.2   | 79.4               | 189.4        | 125.9              | 102.0   | 17.0               | 4826.0  | 292.9              |
| Mn     | 48      | 3.7     | 0.7                | 6.1          | 2.3                | 4.3     | 0.2                | 163.0   | 1.4                |
| Hg     | nd      | nd      | nd                 | nd           | nd                 | nd      | nd                 | nd      | nd                 |
| Ni     | nd      | 0.4     | 0.0                | 0.3          | 0.1                | 0.3     | 0.0                | 0.9     | 0.3                |
| Pb     | nd      | 0.2     | 0.1                | 0.4          | 0.1                | 0.3     | 0.0                | 0.9     | 0.3                |
| Cu     | nd      | 1.6     | 0.2                | 2.5          | 0.8                | 1.8     | 0.3                | 2.3     | 0.8                |
| Zn     | 24      | 6.7     | 0.5                | 6.5          | 2.0                | 9.5     | 0.9                | 19.4    | 1.6                |
|        | EL-2-AQ | EL-2-VE |                    | EL-2-TH.all. |                    | EL-2-PO |                    | EL-2-PA |                    |
| PTEs   | 1       | Mean    | Standard deviation | Mean         | Standard deviation | Mean    | Standard deviation | Mean    | Standard deviation |
| Al     | 133     | 39.1    | 9.7                | 102.4        | 40.0               | 52.1    | 16.1               | 5830.2  | 293.7              |
| Sb     | nd      | nd      | nd                 | nd           | nd                 | nd      | nd                 | nd      | nd                 |
| As     | 5       | 0.4     | 0.3                | 0.8          | 0.4                | 0.3     | 0.1                | 0.3     | 0.2                |
| Cd     | nd      | nd      | nd                 | nd           | nd                 | nd      | nd                 | nd      | nd                 |
| Cr tot | nd      | 0.2     | 0.0                | 0.4          | 0.2                | 0.3     | 0.0                | 1.5     | 0.2                |
| Fe     | 27      | 145.6   | 70.2               | 264.2        | 143.0              | 109.0   | 12.2               | 4425.1  | 442.8              |
| Mn     | 36      | 5.3     | 1.8                | 13.1         | 6.7                | 4.5     | 0.3                | 142.5   | 5.3                |
| Hg     | nd      | nd      | nd                 | nd           | nd                 | nd      | nd                 | nd      | nd                 |
| Ni     | nd      | 1.3     | 1.2                | 0.5          | 0.2                | 0.5     | 0.1                | 0.6     | 0.1                |

|    |    |     |     |     |     |     |     |      |     |
|----|----|-----|-----|-----|-----|-----|-----|------|-----|
| Pb | nd | 0.3 | 0.1 | 0.7 | 0.3 | 0.4 | 0.0 | 0.5  | 0.1 |
| Cu | nd | 1.9 | 0.5 | 5.2 | 2.4 | 1.7 | 0.2 | 1.3  | 0.2 |
| Zn | 19 | 6.5 | 1.1 | 5.6 | 0.7 | 9.1 | 1.6 | 14.5 | 2.2 |
