# Supplementary material for: Myco-Barriers as Sustainable Tool for Port Seawater Decontamination from Metals
Source: MDPI journal article supplement (doi:10.3390/jmse11061117), 2023-05-25
Supplement: s1 [file s1]

Archive with 7 entries (7 files):
- Table S1.pdf
- Table S2.pdf
- Table S3.pdf
- Table S4.pdf
- Table S5.pdf
- Table S6.pdf
- Table S7.pdf
